# Supplementary material
Source: PubMed Central journal article supplement (PMC8101338)
Supplement: 10096_2021_4260_MOESM1_ESM.pdf [file 10096_2021_4260_MOESM1_ESM.pdf]

**Supplementary Table 1. Levels of Inflammatory Markers after excluding patients that received any steroids or Tocilizumab or Sarilumab**

| Lab result - median (IQR)  |              | All patients     | BMI <18.5        | BMI 18.5-24                 | BMI 25-29                  | BMI 30-34                 | BMI ≥35                  | p-value |
|----------------------------|--------------|------------------|------------------|-----------------------------|----------------------------|---------------------------|--------------------------|---------|
|                            | missing data | N=2389           | n=62             | n=570                       | n=795                      | n=541                     | n=421                    |         |
|                            |              |                  | (a)              | (b)                         | (c)                        | (d)                       | (e)                      |         |
| <b>IL-6</b>                | 1,517        | 32.3 (15.2-63.7) | 35.9 (23.9-73.8) | 36.6 (16.3-64.5)            | 30.4 (13.9-62.1)           | 29.8 (15.5-63.8)          | 32.2 (12.8-60.9)         | 0.135   |
| <b>CRP - initial</b>       | 484          | 8.2 (3.8-16.3)   | 6.4 (2.7-16.5)   | 6.9 (3.3-15.4)              | 9.6 (4.2-16.6)             | 7.6 (3.6-15.5)            | 8.9 (4.3-17.4)           | 0.056   |
| <b>CRP - maximum</b>       | 20           | 7.5 (0.9-17.1)   | 5.9 (1.6-18.3)   | 5.9 (0.6-15.7)              | 8.8 (0.9-17.6)             | 6.8 (1.1-16.7)            | 7.8 (1.3-18.5)           | 0.338   |
| <b>CRP - final</b>         | 488          | 5.8 (2.6-12.6)   | 6.5 (3.5-16.5)   | 5.7 (2.6-12.7)              | 6.5 (2.5-13.3)             | 5.5 (2.5-12)              | 5.1 (2.6-11)             | 0.985   |
| <b>WBC - initial</b>       | 207          | 7 (5.3-9.5)      | 7.5 (5.9-11.2)   | 7.2 (5.4-10.6)              | 7.4 (5.6-10.2)             | 7 (5.3-9.4)               | 7.3 (5.4-9.5)            | 0.157   |
| <b>Neutrophils-initial</b> | 208          | 5.2 (3.7-7.5)    | 5.2 (3.9-8.9)    | 5.4 (3.6-8.5) <sup>de</sup> | 5.3 (3.9-7.7) <sup>d</sup> | 5 (3.5-6.9) <sup>bc</sup> | 5.1 (3.6-7) <sup>b</sup> | <0.001  |
| <b>Lymphocytes-initial</b> | 207          | 1 (0.7-1.4)      | 0.9 (0.6-1.3)    | 0.9 (0.6-1.3)               | 1 (0.7-1.4)                | 1.1 (0.8-1.4)             | 1.1 (0.8-1.4)            | 0.349   |

Notes: (1) p-Values refer to ANOVA and the letters denote the columns with which a statistically significant pairwise comparison exists (Bonferroni's method), (2) BMI in kg/m<sup>2</sup>, IL-6 in pg/mL, CRP in mg/dL, WBC in 10<sup>3</sup>/μL, neutrophils 10<sup>3</sup>/μL, lymphocytes in 10<sup>3</sup>/μL

Abbreviations: BMI=body mass index, IQR=interquartile range, CRP=C-reactive protein, IL-6=interleukin, WBC=white blood cell count

**Supplementary Table 2. Mortality and Inflammatory markers - AUC values and 95% CI per BMI group**

|                            | <b>BMI &lt;18.5</b> | <b>BMI 18.5-24</b>  | <b>BMI 25-29</b>    | <b>BMI 30-34</b>    | <b>BMI ≥35</b>      | <b>p-value</b> |
|----------------------------|---------------------|---------------------|---------------------|---------------------|---------------------|----------------|
| <b>IL-6</b>                | 0.663 (0.362-0.963) | 0.761 (0.673-0.849) | 0.906 (0.844-0.967) | 0.911 (0.862-0.960) | 0.872 (0.804-0.941) | 0.023          |
| <b>CRP - initial</b>       | 0.619 (0.454-0.783) | 0.735 (0.676-0.793) | 0.756 (0.706-0.806) | 0.733 (0.671-0.794) | 0.830 (0.766-0.894) | 0.064          |
| <b>CRP - maximum</b>       | 0.555 (0.392-0.717) | 0.576 (0.511-0.641) | 0.641 (0.581-0.701) | 0.638 (0.559-0.716) | 0.629 (0.539-0.719) | 0.546          |
| <b>CRP - final</b>         | 0.759 (0.613-0.905) | 0.841 (0.795-0.887) | 0.915 (0.883-0.945) | 0.877 (0.831-0.923) | 0.921 (0.872-0.969) | 0.021          |
| <b>WBC - initial</b>       | 0.525 (0.359-0.691) | 0.579 (0.521-0.638) | 0.631 (0.576-0.686) | 0.654 (0.576-0.686) | 0.569 (0.501-0.638) | 0.208          |
| <b>Neutrophils-initial</b> | 0.551 (0.388-0.715) | 0.598 (0.542-0.655) | 0.646 (0.594-0.700) | 0.672 (0.614-0.731) | 0.599 (0.532-0.666) | 0.262          |
| <b>Lymphocytes-initial</b> | 0.403 (0.242-0.564) | 0.387 (0.329-0.445) | 0.442 (0.386-0.497) | 0.416 (0.345-0.487) | 0.390 (0.319-0.461) | 0.701          |

Notes: (1) p-Values refer to Chi-square test (2) BMI in kg/m<sup>2</sup>, IL-6 in pg/mL, CRP in mg/dL, WBC in 10<sup>3</sup>/μL, neutrophils 10<sup>3</sup>/μL, lymphocytes in 10<sup>3</sup>/μL

Abbreviations: BMI=body mass index, IQR=interquartile range, CRP=C-reactive protein, IL-6=interleukin, WBC=white blood cell count

**Supplementary Table 3: Multivariate Analysis for the Primary Outcome using the Charlson Comorbidity Index**

| <b>Variables</b>                  | <b>Model 1</b>                 | <b>Model 2</b>                 | <b>Model 3</b>                 | <b>Model 4</b>                 | <b>Model 5</b>                  |
|-----------------------------------|--------------------------------|--------------------------------|--------------------------------|--------------------------------|---------------------------------|
|                                   | n=3499                         | n=3499                         | n=3499                         | n=3499                         | n=1564                          |
|                                   | OR (95% CI), p-value            |
| <b>Male sex</b>                   | 1.57 (1.33 - 1.85)<br>p< 0.001 | 1.58 (1.34 - 1.86)<br>p< 0.001 | 1.56 (1.32 - 1.83)<br>p< 0.001 | 1.60 (1.36 - 1.89)<br>p< 0.001 | 1.44 (1.10 - 1.89) p=0.007      |
| <b>Age per 10 years</b>           | 1.43 (1.30 - 1.57)<br>p< 0.001 | 1.43 (1.30 - 1.58)<br>p< 0.001 | 1.42 (1.30 - 1.57)<br>p< 0.001 | 1.45 (1.31 - 1.59)<br>p< 0.001 | 1.47 (1.25 - 1.72)<br>p=< 0.001 |
| <b>BMI ≥30</b>                    | 1.26 (1.07 - 1.50)<br>p=0.007  |                                |                                |                                |                                 |
| <b>BMI ≥35</b>                    |                                | 1.46 (1.17 - 1.82)<br>p< 0.001 |                                |                                |                                 |
| <b>BMI ≥40</b>                    |                                |                                | 1.68 (1.23 - 2.30)<br>p< 0.001 |                                |                                 |
| <b>BMI &lt;18.5<sup>(2)</sup></b> |                                |                                |                                | 1.33 (0.81 - 2.20)<br>p=0.264  | 0.90 (0.35 - 2.32) p=0.824      |
| <b>25-29.9<sup>(2)</sup></b>      |                                |                                |                                | 1.04 (0.84 - 1.29)<br>p=0.699  | 1.14 (0.81 - 1.60) p=0.448      |
| <b>30-34.9<sup>(2)</sup></b>      |                                |                                |                                | 1.16 (0.91 - 1.47)<br>p=0.225  | 1.40 (0.97 - 2.03) p=0.073      |
| <b>35-39.9<sup>(2)</sup></b>      |                                |                                |                                | 1.38 (1.02 - 1.87)<br>p=0.039  | 1.23 (0.74 - 2.03) p=0.429      |
| <b>≥ 40<sup>(2)</sup></b>         |                                |                                |                                | 1.88 (1.32 - 2.68)<br>p< 0.001 | 1.71 (0.99 - 2.96) p=0.056      |
| <b>CCI 1-2<sup>(3)</sup></b>      | 1.25 (0.83 - 1.87)<br>p=0.278  | 1.26 (0.84 - 1.89)<br>p=0.260  | 1.29 (0.86 - 1.93)<br>p=0.215  | 1.27 (0.85 - 1.91)<br>p=0.239  | 0.98 (0.53 - 1.81) p=0.946      |

|                                      |                                |                                |                                |                                |                             |
|--------------------------------------|--------------------------------|--------------------------------|--------------------------------|--------------------------------|-----------------------------|
| <b>3-4<sup>(3)</sup></b>             | 2.11 (1.32 - 3.38)<br>p=0.002  | 2.12 (1.32 - 3.38)<br>p=0.002  | 2.15 (1.35 - 3.44)<br>p<0.001  | 2.14 (1.34 - 3.41)<br>p=0.002  | 1.66 (0.81 - 3.42) p=0.168  |
| <b>≥ 5<sup>(3)</sup></b>             | 3.01 (1.86 - 4.89)<br>p< 0.001 | 3.03 (1.87 - 4.90)<br>p< 0.001 | 3.06 (1.89 - 4.95)<br>p< 0.001 | 3.05 (1.88 - 4.94)<br>p< 0.001 | 2.13 (1.01 - 4.47) p=0.046  |
| <b>Interleukin-6<br/>per 10pg/ml</b> |                                |                                |                                |                                | 1.06 (1.03 - 1.09) p< 0.001 |

Notes: (1) BMI in kg/m<sup>2</sup>, (2) reference group: BMI 18.5-24.9 kg/m<sup>2</sup>, (3) reference group: CCI=0, (4) age was analyzed as a continuous variable, 10 years was used as a unit of time for easier interpretation of OR (95% CI)

Abbreviations: OR=odds ratio, CI=confidence interval, BMI=body mass index, CCI= Charlson Comorbidity Index

**Supplementary table 4:** Multivariate Analysis for the Primary and Secondary Outcomes

| <b>PANEL A: Mortality</b>         |                            |                            |                            |                            |                            |
|-----------------------------------|----------------------------|----------------------------|----------------------------|----------------------------|----------------------------|
| <b>VARIABLES</b>                  | <b>Model 1</b>             | <b>Model 2</b>             | <b>Model 3</b>             | <b>Model 4</b>             | <b>Model 5</b>             |
|                                   | n=3,499                    | n=3,499                    | n=3,499                    | n=3,499                    | n=1,564                    |
| <b>Male sex</b>                   | 1.57 (1.33 - 1.85) p<0.001 | 1.58 (1.34 - 1.87) p<0.001 | 1.56 (1.32 - 1.84) p<0.001 | 1.61 (1.36 - 1.90) p<0.001 | 1.43 (1.09 - 1.88) p=0.010 |
| <b>Age per 10 years</b>           | 1.74 (1.62 - 1.87) p<0.001 | 1.75 (1.63 - 1.88) p<0.001 | 1.74 (1.62 - 1.86) p<0.001 | 1.77 (1.64 - 1.90) p<0.001 | 1.77 (1.57 - 1.99) p<0.001 |
| <b>BMI ≥30</b>                    | 1.27 (1.07 - 1.51) p=0.006 |                            |                            |                            |                            |
| <b>BMI ≥35</b>                    |                            | 1.49 (1.20 - 1.85) p<0.001 |                            |                            |                            |
| <b>BMI ≥40</b>                    |                            |                            | 1.68 (1.23 - 2.29) p=0.001 |                            |                            |
| <b>BMI &lt;18.5<sup>(2)</sup></b> |                            |                            |                            | 1.38 (0.82 - 2.30) p=0.221 | 0.86 (0.33 - 2.22) p=0.753 |
| <b>25-29.9<sup>(2)</sup></b>      |                            |                            |                            | 1.07 (0.86 - 1.32) p=0.543 | 1.17 (0.83 - 1.65) p=0.363 |
| <b>30-34.9<sup>(2)</sup></b>      |                            |                            |                            | 1.17 (0.92 - 1.49) p=0.195 | 1.40 (0.96 - 2.05) p=0.077 |
| <b>35-39.9<sup>(2)</sup></b>      |                            |                            |                            | 1.44 (1.06 - 1.96) p=0.020 | 1.36 (0.81 - 2.26) p=0.243 |
| <b>≥ 40<sup>(2)</sup></b>         |                            |                            |                            | 1.92 (1.35 - 2.72) p<0.001 | 1.81 (1.05 - 3.13) p=0.033 |
| <b>Congestive Heart Failure</b>   | 1.33 (1.00 - 1.77) p=0.051 | 1.32 (0.99 - 1.75) p=0.062 | 1.32 (0.99 - 1.76) p=0.059 | 1.31 (0.98 - 1.75) p=0.064 | 1.02 (0.63 - 1.65) p=0.947 |
| <b>Coronary Artery Disease</b>    | 1.11 (0.82 - 1.50) p=0.489 | 1.12 (0.83 - 1.52) p=0.450 | 1.12 (0.82 - 1.51) p=0.477 | 1.12 (0.83 - 1.52) p=0.454 | 1.66 (1.07 - 2.60) p=0.025 |
| <b>Diabetes</b>                   | 1.16 (0.98 - 1.38) p=0.091 | 1.16 (0.98 - 1.38) p=0.090 | 1.16 (0.98 - 1.38) p=0.084 | 1.16 (0.98 - 1.38) p=0.090 | 1.00 (0.75 - 1.32) p=0.994 |

|                                    |                            |                            |                            |                            |                            |
|------------------------------------|----------------------------|----------------------------|----------------------------|----------------------------|----------------------------|
| <b>Chronic Kidney Disease</b>      | 1.51 (1.20 - 1.89) p<0.001 | 1.50 (1.20 - 1.88) p<0.001 | 1.50 (1.19 - 1.87) p<0.001 | 1.50 (1.20 - 1.88) p<0.001 | 1.60 (1.11 - 2.30) p=0.011 |
| <b>COPD</b>                        | 1.43 (0.99 - 2.06) p=0.058 | 1.45 (1.01 - 2.10) p=0.047 | 1.43 (0.99 - 2.07) p=0.056 | 1.44 (1.00 - 2.09) p=0.051 | 1.49 (0.80 - 2.80) p=0.212 |
| <b>Tobacco Use</b>                 | 1.07 (0.77 - 1.50) p=0.684 | 1.06 (0.76 - 1.47) p=0.747 | 1.06 (0.76 - 1.49) p=0.714 | 1.07 (0.76 - 1.49) p=0.705 | 0.88 (0.52 - 1.50) p=0.641 |
| <b>Hypertension</b>                | 0.72 (0.60 - 0.87) p=0.001 | 0.71 (0.59 - 0.86) p<0.001 | 0.72 (0.60 - 0.87) p=0.001 | 0.71 (0.59 - 0.86) p<0.001 | 0.57 (0.43 - 0.76) p<0.001 |
| <b>Hyperlipidemia</b>              | 0.82 (0.69 - 0.98) p=0.031 | 0.83 (0.69 - 0.99) p=0.039 | 0.83 (0.69 - 0.99) p=0.038 | 0.83 (0.69 - 0.99) p=0.039 | 0.97 (0.73 - 1.29) p=0.833 |
| <b>Cirrhosis</b>                   | 1.96 (0.98 - 3.91) p=0.057 | 1.97 (0.99 - 3.93) p=0.053 | 1.94 (0.97 - 3.86) p=0.060 | 2.02 (1.01 - 4.03) p=0.047 | 0.94 (0.20 - 4.38) p=0.937 |
| <b>Peripheral Vascular Disease</b> | 1.36 (0.93 - 2.00) p=0.114 | 1.37 (0.94 - 2.01) p=0.103 | 1.36 (0.93 - 1.99) p=0.114 | 1.36 (0.93 - 1.99) p=0.115 | 1.68 (0.88 - 3.21) p=0.113 |
| <b>CVA or TIA</b>                  | 1.34 (0.94 - 1.92) p=0.106 | 1.35 (0.94 - 1.94) p=0.099 | 1.34 (0.93 - 1.92) p=0.112 | 1.35 (0.94 - 1.94) p=0.103 | 1.03 (0.57 - 1.88) p=0.922 |
| <b>Interleukin-6 per 10pg/ml</b>   |                            |                            |                            |                            | 1.06 (1.03 - 1.09) p<0.001 |
| <b>PANEL B: Severe pneumonia</b>   |                            |                            |                            |                            |                            |
| <b>VARIABLES</b>                   | <b>Model 1</b>             | <b>Model 2</b>             | <b>Model 3</b>             | <b>Model 4</b>             | <b>Model 5</b>             |
|                                    | n=3,499                    | n=3,499                    | n=3,499                    | n=3,499                    | n=1,564                    |
| <b>Male sex</b>                    | 1.49 (1.25 - 1.78) p<0.001 | 1.48 (1.25 - 1.77) p<0.001 | 1.43 (1.21 - 1.70) p<0.001 | 1.52 (1.28 - 1.82) p<0.001 | 1.43 (1.09 - 1.89) p=0.011 |
| <b>Age per 10 years</b>            | 1.12 (1.05 - 1.19) p<0.001 | 1.11 (1.05 - 1.18) p<0.001 | 1.09 (1.03 - 1.16) p=0.002 | 1.14 (1.07 - 1.21) p<0.001 | 1.06 (0.96 - 1.17) p=0.215 |
| <b>BMI ≥30</b>                     | 1.57 (1.31 - 1.87) p<0.001 |                            |                            |                            |                            |
| <b>BMI ≥35</b>                     |                            | 1.71 (1.38 - 2.11) p<0.001 |                            |                            |                            |

|                                   |                            |                            |                               |                               |                               |
|-----------------------------------|----------------------------|----------------------------|-------------------------------|-------------------------------|-------------------------------|
| <b>BMI ≥40</b>                    |                            |                            | 1.61 (1.21 - 2.15)<br>p=0.001 |                               |                               |
| <b>BMI &lt;18.5<sup>(2)</sup></b> |                            |                            |                               | 0.71 (0.36 - 1.38)<br>p=0.311 | 0.20 (0.01 - 4.88)<br>p=0.325 |
| <b>25-29.9<sup>(2)</sup></b>      |                            |                            |                               | 1.13 (0.89 - 1.44)<br>p=0.312 | 1.21 (0.82 - 1.79)<br>p=0.336 |
| <b>30-34.9<sup>(2)</sup></b>      |                            |                            |                               | 1.44 (1.11 - 1.87)<br>p=0.006 | 1.69 (1.13 - 2.53)<br>p=0.011 |
| <b>35-39.9<sup>(2)</sup></b>      |                            |                            |                               | 1.97 (1.44 - 2.69)<br>p<0.001 | 1.61 (0.96 - 2.70)<br>p=0.073 |
| <b>≥ 40<sup>(2)</sup></b>         |                            |                            |                               | 2.10 (1.49 - 2.97)<br>p<0.001 | 2.29 (1.34 - 3.92)<br>p=0.002 |
| <b>Congestive Heart Failure</b>   | 1.07 (0.79 - 1.43) p=0.667 | 1.06 (0.79 - 1.43) p=0.694 | 1.07 (0.80 - 1.44) p=0.657    | 1.06 (0.79 - 1.42) p=0.720    | 0.94 (0.57 - 1.56) p=0.819    |
| <b>Diabetes</b>                   | 1.23 (1.03 - 1.45) p=0.020 | 1.23 (1.04 - 1.46) p=0.016 | 1.25 (1.05 - 1.48) p=0.012    | 1.21 (1.02 - 1.43) p=0.033    | 1.10 (0.85 - 1.44) p=0.469    |
| <b>Chronic Kidney Disease</b>     | 1.41 (1.10 - 1.81) p=0.008 | 1.41 (1.10 - 1.82) p=0.008 | 1.41 (1.09 - 1.81) p=0.008    | 1.41 (1.10 - 1.81) p=0.007    | 1.37 (0.93 - 2.00) p=0.108    |
| <b>ESRD</b>                       | 1.23 (0.80 - 1.89) p=0.340 | 1.20 (0.78 - 1.83) p=0.400 | 1.18 (0.77 - 1.81) p=0.442    | 1.25 (0.81 - 1.91) p=0.315    | 1.45 (0.74 - 2.86) p=0.283    |
| Interleukin-6 per 10pg/ml         |                            |                            |                               |                               | 1.03 (1.01 - 1.05) p=0.001    |

Notes: (1) BMI in kg/m<sup>2</sup>, (2) reference group: BMI 18.5-24.9 kg/m<sup>2</sup> (3) age was analyzed as a continuous variable, 10 years was used as a unit of time for easier interpretation of OR (95% CI)

Abbreviations: OR=odds ratio, CI=confidence interval, BMI=body mass index, CAD=coronary artery disease, CKD=chronic kidney disease, COPD=chronic obstructive pulmonary disease, PAD=peripheral artery disease, CVA=cerebrovascular disease. TIA=transient ischemic attack, ESRD=end-stage renal disease

**Supplementary Table 5: Sex-based Subgroup Analysis for the Outcome of Mortality**

| <b>VARIABLES</b>                | <b>Women</b>                  | <b>Men</b>                    | <b>Women</b>                  | <b>Men</b>                    |
|---------------------------------|-------------------------------|-------------------------------|-------------------------------|-------------------------------|
|                                 | n=1,567                       | n=1,932                       | n=683                         | n=881                         |
|                                 | OR (95% CI), p-value          |
| <b>Age per 10 years</b>         | 1.62 (1.45 - 1.81)<br>p<0.001 | 1.91 (1.73 - 2.10)<br>p<0.001 | 1.52 (1.27 - 1.82)<br>p<0.001 | 1.98 (1.69 - 2.33)<br>p<0.001 |
| <b>BMI &lt;18.5(2)</b>          | 1.92 (0.89 - 4.12)<br>p=0.094 | 1.01 (0.51 - 2.00)<br>p=0.975 | 1.14 (0.21 - 6.19)<br>p=0.879 | 0.71 (0.23 - 2.14)<br>p=0.539 |
| <b>25-29.9(2)</b>               | 1.19 (0.83 - 1.69)<br>p=0.349 | 1.00 (0.76 - 1.31)<br>p=0.997 | 1.12 (0.65 - 1.94)<br>p=0.685 | 1.18 (0.75 - 1.85)<br>p=0.469 |
| <b>30-34.9(2)</b>               | 1.08 (0.74 - 1.58)<br>p=0.680 | 1.25 (0.91 - 1.72)<br>p=0.161 | 1.02 (0.57 - 1.81)<br>p=0.956 | 1.74 (1.05 - 2.89)<br>p=0.033 |
| <b>35-39.9(2)</b>               | 1.09 (0.69 - 1.74)<br>p=0.712 | 1.99 (1.31 - 3.00)<br>p=0.001 | 1.07 (0.51 - 2.25)<br>p=0.858 | 1.63 (0.82 - 3.24)<br>p=0.162 |
| <b>≥40(2)</b>                   | 1.72 (1.05 - 2.81)<br>p=0.031 | 2.26 (1.33 - 3.84)<br>p=0.002 | 1.35 (0.64 - 2.86)<br>p=0.435 | 2.28 (0.96 - 5.42)<br>p=0.062 |
| <b>Congestive Heart Failure</b> | 1.88 (1.20 - 2.96)<br>p=0.006 | 0.97 (0.67 - 1.41)<br>p=0.880 | 1.93 (0.96 - 3.88)<br>p=0.066 | 0.55 (0.26 - 1.15)<br>p=0.114 |
| <b>Coronary Artery Disease</b>  | 0.94 (0.56 - 1.58)<br>p=0.811 | 1.29 (0.88 - 1.88)<br>p=0.195 | 1.39 (0.69 - 2.79)<br>p=0.360 | 1.82 (1.00 - 3.31)<br>p=0.048 |
| <b>Diabetes</b>                 | 1.15 (0.88 - 1.51)<br>p=0.307 | 1.17 (0.93 - 1.47)<br>p=0.186 | 1.02 (0.66 - 1.56)<br>p=0.943 | 1.01 (0.68 - 1.48)<br>p=0.973 |
| <b>Chronic Kidney Disease</b>   | 1.93 (1.38 - 2.70)<br>p<0.001 | 1.21 (0.90 - 1.65)<br>p=0.211 | 2.18 (1.28 - 3.70)<br>p=0.004 | 1.29 (0.77 - 2.17)<br>p=0.331 |
| <b>COPD</b>                     | 1.42 (0.85 - 2.36)<br>p=0.177 | 1.32 (0.78 - 2.26)<br>p=0.303 | 1.20 (0.48 - 3.00)<br>p=0.703 | 1.34 (0.52 - 3.43)<br>p=0.548 |
| <b>Tobacco Use</b>              | 1.34 (0.78 - 2.30)<br>p=0.295 | 0.96 (0.63 - 1.47)<br>p=0.861 | 1.14 (0.45 - 2.89)<br>p=0.790 | 0.71 (0.35 - 1.44)<br>p=0.345 |



|                                    |                               |                               |                               |                                |
|------------------------------------|-------------------------------|-------------------------------|-------------------------------|--------------------------------|
| <b>Hypertension</b>                | 0.72 (0.54 - 0.96)<br>p=0.024 | 0.70 (0.55 - 0.90)<br>p=0.005 | 0.60 (0.38 - 0.93)<br>p=0.024 | 0.53 (0.36 - 0.79)<br>p=0.002  |
| <b>Hyperlipidemia</b>              | 0.80 (0.60 - 1.06)<br>p=0.114 | 0.85 (0.67 - 1.08)<br>p=0.188 | 0.83 (0.53 - 1.30)<br>p=0.411 | 1.09 (0.75 - 1.59)<br>p=0.661  |
| <b>Cirrhosis</b>                   | 2.58 (0.94 - 7.09)<br>p=0.066 | 1.41 (0.54 - 3.68)<br>p=0.479 | 0.63 (0.05 - 8.24)<br>p=0.725 | 1.06 (0.09 - 12.52)<br>p=0.961 |
| <b>Peripheral Vascular Disease</b> | 1.10 (0.60 - 2.03)<br>p=0.750 | 1.49 (0.90 - 2.49)<br>p=0.123 | 2.24 (0.86 - 5.82)<br>p=0.099 | 0.97 (0.36 - 2.61)<br>p=0.947  |
| <b>CVA or TIA</b>                  | 1.50 (0.87 - 2.59)<br>p=0.148 | 1.31 (0.81 - 2.11)<br>p=0.271 | 1.12 (0.46 - 2.75)<br>p=0.797 | 1.15 (0.50 - 2.66)<br>p=0.738  |
| <b>Interleukin-6 per 10pg/ml</b>   |                               |                               | 1.04 (1.00 - 1.09)<br>p=0.079 | 1.08 (1.03 - 1.12)<br>p<0.001  |

Notes: (1) BMI in kg/m<sup>2</sup> , (2) reference group: BMI 18.5-24.9 kg/m<sup>2</sup> (3) age was analyzed as a continuous variable, 10 years was used as a unit of time for easier interpretation of OR (95% CI)

Abbreviations: OR=odds ratio, CI=confidence interval, BMI=body mass index, CAD=coronary artery disease, CKD=chronic kidney disease, COPD=chronic obstructive pulmonary disease, PAD=peripheral artery disease, CVA=cerebrovascular disease. TIA=transient ischemic attack.
